# Supplementary material for: Expanded circulating follicular dendritic cells facilitate immune responses in chronic HBV infection
Source: PubMed Central journal article supplement (PMC7648402; doi:10.1186/s12967-020-02584-6), 2020-11-07
Supplement: 12967_2020_2584_MOESM1_ESM.pdf [file 12967_2020_2584_MOESM1_ESM.pdf]

## Additional file 1

### Figure S1

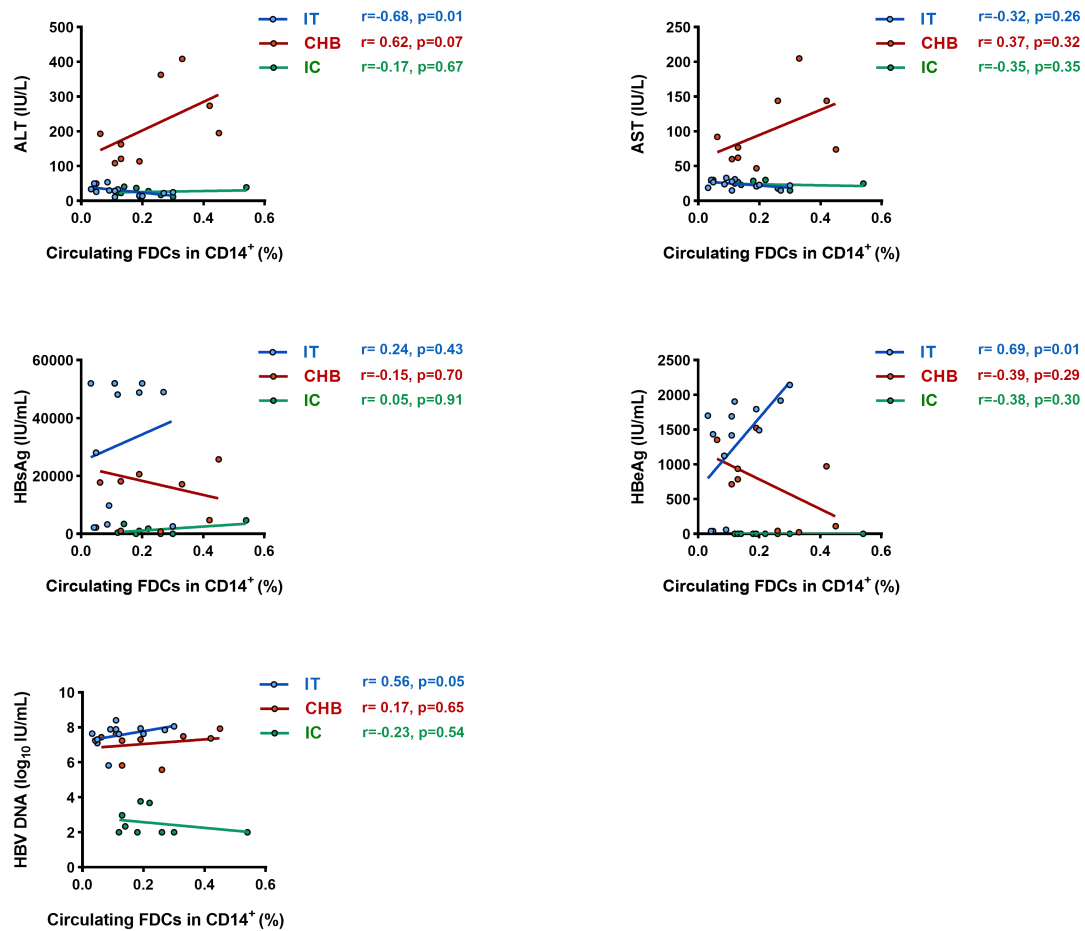

**Figure S1. Correlations between the frequency of circulating follicular dendritic cells (FDCs) and clinical indicators in chronically HBV-infected patients during different clinical phases.** Correlations between the frequency of circulating FDCs and serum levels of ALT, AST, HBsAg, HBeAg, and HBV DNA in immune tolerant carrier (IT, n = 13), HBeAg-positive CHB (CHB, n = 9), and inactive carrier (IC, n = 9) patients.
