# Supplementary material for: Expanded circulating follicular dendritic cells facilitate immune responses in chronic HBV infection
Source: PubMed Central journal article supplement (PMC7648402; doi:10.1186/s12967-020-02584-6), 2020-11-07
Supplement: 12967_2020_2584_MOESM2_ESM.pdf [file 12967_2020_2584_MOESM2_ESM.pdf]

## Additional file 2

### Figure S2

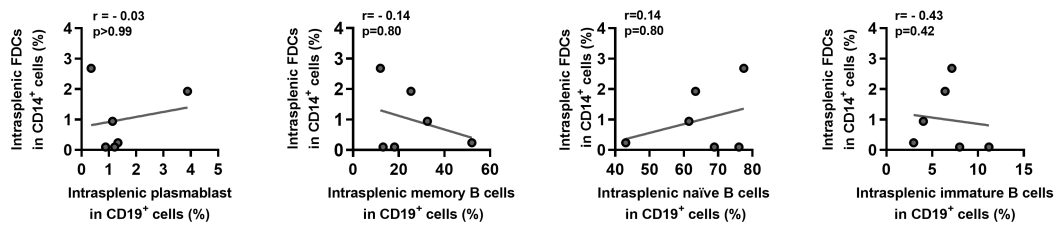

**Figure S2. Correlations between the frequencies of intrasplenic follicular dendritic cells (FDCs) and B cell subsets in patients who underwent splenectomy due to HBV-related liver cirrhosis-induced hypersplenism.** Splenic tissues were obtained from patients who underwent splenectomy due to HBV-related liver cirrhosis-induced hypersplenism (n = 6) and intrasplenic mononuclear cells were isolated, the correlations between the frequencies of intrasplenic follicular dendritic cells (FDCs) and plasmablast (CD19<sup>+</sup>CD38<sup>+</sup>CD27<sup>+</sup>), memory B cells (CD19<sup>+</sup>CD27<sup>+</sup>CD38<sup>-</sup>), naïve B cells (CD19<sup>+</sup>CD10<sup>-</sup>CD27<sup>-</sup>), and immature B cells (CD19<sup>+</sup>CD10<sup>+</sup>CD27<sup>-</sup>) were analyzed. Spearman rank correlation test.
