# Supplementary material for: Expanded circulating follicular dendritic cells facilitate immune responses in chronic HBV infection
Source: PubMed Central journal article supplement (PMC7648402; doi:10.1186/s12967-020-02584-6), 2020-11-07
Supplement: 12967_2020_2584_MOESM3_ESM.pdf [file 12967_2020_2584_MOESM3_ESM.pdf]

## Additional file 3

### Figure S3

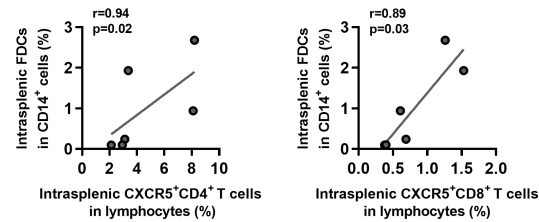

**Figure S3. Correlations between the frequencies of intrasplenic follicular dendritic cells (FDCs) and T cell subsets in patients who underwent splenectomy due to HBV-related liver cirrhosis-induced hypersplenism.** Splenic tissues were obtained from patients who underwent splenectomy due to HBV-related liver cirrhosis-induced hypersplenism ( $n = 6$ ) and intrasplenic mononuclear cells were isolated, the correlations between the frequencies of intrasplenic FDCs and CXCR5<sup>+</sup>CD4<sup>+</sup> T cells and CXCR5<sup>+</sup>CD8<sup>+</sup> T cells were analyzed. Spearman rank correlation test.
