# Supplementary material for: Expanded circulating follicular dendritic cells facilitate immune responses in chronic HBV infection
Source: PubMed Central journal article supplement (PMC7648402; doi:10.1186/s12967-020-02584-6), 2020-11-07
Supplement: 12967_2020_2584_MOESM4_ESM.pdf [file 12967_2020_2584_MOESM4_ESM.pdf]

#### Additional file 4

**Table S1. Clinical characteristics of healthy controls (HCs) and chronically HBV-infected patients classified as IT, hepatitis B e antigen (HBeAg)-positive CHB, and IC.**

|                                       | HCs        | IT                 | CHB                 | IC               |
|---------------------------------------|------------|--------------------|---------------------|------------------|
| Number                                | 10         | 13                 | 9                   | 9                |
| Gender (male/female)                  | 6/4        | 6/7                | 6/3                 | 6/3              |
| Age (years)*                          | 22 (19-26) | 23 (11-57)         | 45 (20-48)          | 35 (18-37)       |
| ALT (IU/L)*                           | NA         | 29 (11-50)         | 193 (109-409)       | 24 (12-41)       |
| AST (IU/L)*                           | NA         | 24 (15-33)         | 77 (47-205)         | 25 (15-30)       |
| HBV DNA<br>(log <sub>10</sub> IU/mL)* | NA         | 7.65 (5.83-8.41)   | 7.37 (5.58-7.93)    | 1.98 (1.98-3.78) |
| HBsAg (IU/mL)*                        | NA         | 48142 (2174-52000) | 17791 (777.5-52000) | 753 (2.47-4672)  |
| HBeAg<br>(positive/negative)          | NA         | 13/0               | 9/0                 | 0/9              |

\*Data are shown as median (range). ALT, alanine aminotransferase; AST, aspartate aminotransferase; HCs, healthy controls; IT, immune tolerant carrier; CHB, hepatitis B e antigen (HBeAg)-positive chronic hepatitis B; IC, inactive carrier; NA, not applicable. Figure 2a available data from 10 HCs, 13 IT, 9 CHB and 9 IC patients. Figure 2b-e, Figure 3c and Additional file 1: Figure S1 available data from 13 IT, 9 CHB and 9 IC patients.
