# Supplementary material for: Expanded circulating follicular dendritic cells facilitate immune responses in chronic HBV infection
Source: PubMed Central journal article supplement (PMC7648402; doi:10.1186/s12967-020-02584-6), 2020-11-07
Supplement: 12967_2020_2584_MOESM5_ESM.pdf [file 12967_2020_2584_MOESM5_ESM.pdf]

## Additional file 5

**Table S2. Clinical characteristics of chronically HBV-infected patients, patients with HBV-related hepatocellular carcinoma (HCC) who underwent curative hepatectomy, and patients who underwent splenectomy due to HBV-related liver cirrhosis-induced hypersplenism.**

|                                       | chronically<br>HBV-infected patients | HBV-related HCC  | HBV-related liver cirrhosis<br>-induced hypersplenism |
|---------------------------------------|--------------------------------------|------------------|-------------------------------------------------------|
| Number                                | 55                                   | 22               | 17                                                    |
| Gender (male/female)                  | 37/18                                | 20/2             | 14/3                                                  |
| Age (years)*                          | 42 (11-62)                           | 44 (34-62)       | 43 (34-60)                                            |
| ALT (IU/L)*                           | 36 (10-409)                          | 32 (10-221)      | 26 (10-47)                                            |
| AST (IU/L)*                           | 28 (15-205)                          | 37 (17-146)      | 26 (15-58)                                            |
| HBV DNA<br>(log <sub>10</sub> IU/mL)* | 3.79 (1.98-8.41)                     | 3.25 (1.98-7.03) | 4.84 (1.98-7.03)                                      |
| HBsAg (IU/mL)*                        | 1828 (0.23-52000)                    | 248 (0.25-52000) | 250 (0.23-250)                                        |
| HBeAg<br>(positive/negative)          | 26/29                                | 3/19             | 3/14                                                  |

\*Data are shown as median (range). ALT, alanine aminotransferase; AST, aspartate aminotransferase. Figure 1b available data from 55 HBV-infected patients, 22 patients with HBV-related HCC and 17 patients with HBV-related liver cirrhosis-induced hypersplenism. Figure 1c available data from 11 patients with HBV-related liver cirrhosis-induced hypersplenism and 11 patients with HBV-related HCC. Figure 3a, available data from 16 HBV-infected patients. Figure 3b, available data from 5 HBV-infected patients.
